# Supplementary material for: Complete genome sequence of Bacillus velezensis YYC, a bacterium isolated from the tomato rhizosphere
Source: Research Square preprint supplement (doi:10.21203/rs.3.rs-903033/v1), 2021-09-16
Supplement: Supplementary file 1 [file b49ebaabd99e320fd3846f6f.docx]

**Supplementary Table S1** Pairwise comparisons of *B. velezensis* YYC with type strain genomes

|  | **YYC** | | | | **FZB42** |
| --- | --- | --- | --- | --- | --- |
| **Cluster ID** | **Compound** | **From** | **To** | **Type** | **presence (+) or absence (-)** |
| Cluster1 | Locillomycin | 193,885 | 216,500 | Lantipeptide | - |
| Cluster2 | Surfactin | 315,192 | 380,054 | NRPS | + |
| Cluster3 | Plantazolicin | 708,853 | 732,030 | RRE-containing | + |
| Cluster4 | ButirosinA/Butirosin B | 973,396 | 1,014,640 | PKS-like | + |
| Cluster5 | Unknown | 1,100,823 | 1,118,052 | Terpene | + |
| Cluster6 | Macrolacin H | 1,422,905 | 1,509,071 | TransAT-PKS | + |
| Cluster7 | Bacillaene | 1,732,529 | 1,832,759 | TransAT-PKS | + |
| Cluster8 | Fengycin | 1,899,676 | 2,083,306 | NRPS | + |
| Cluster9 | Unknown | 2,061,966 | 2,083,849 | Terpene | + |
| Cluster10 | Unknown | 2,143,308 | 2,184,408 | T3PKS | + |
| Cluster11 | Difficidin | 2,312,704 | 2,406,508 | TransAT-PKS | + |
| Cluster12 | Unknown | 2,892,783 | 2,942,307 | NRPS | + |
| Cluster13 | Bacillibactin | 3,039,229 | 3,091,018 | NRPS | + |
| Cluster14 | Bacilysin | 3,624,661 | 3,666,079 | Other | + |
